# Supplementary material for: Polymorphic control by heterogeneous nucleation - A new method for selecting crystalline substrates
Source: Royal Society of Chemistry journal article supplement (doi:10.1039/c1ce05871a), 2011-01-01
Supplement: c1ce05871a.pdf [file c1ce05871a.pdf]

## Supporting Information

### EpiCalc epitaxy calculation for the (001) faces of Form II acetaminophen and graphite

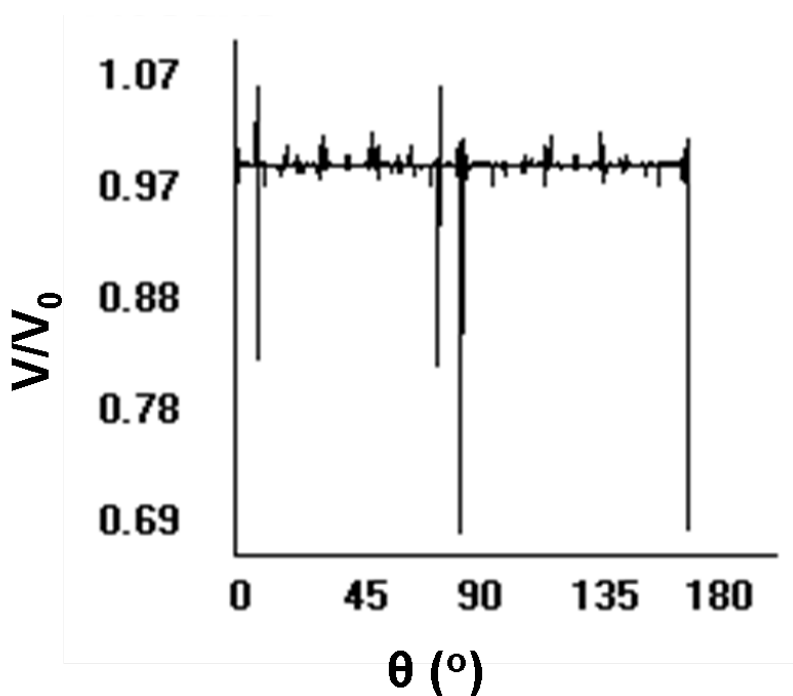

**Figure S1.** A plot of dimensionless potential energy ( $V/V_0$ ) as a function of orientation angle ( $\theta$ ) for the interacting (001) faces of Form II acetaminophen and graphite

The EpiCalc calculation was performed using the following lattice values for the (001) faces of Form II acetaminophen and graphite:

(001) Form II acetaminophen:  $a = 17.1657 \text{ \AA}$ ,  $b = 11.7773 \text{ \AA}$  and  $\beta = 90^\circ$

(001) graphite:  $a = b = 2.456 \text{ \AA}$  and  $\alpha = 90^\circ$

The acetaminophen overlayer dimensions were  $25 \times 25$  cells and the orientation angle range tested was  $180^\circ$  with a step size of  $0.25^\circ$ .

Figure S1 shows that the minimum value of  $V/V_0 = 0.6861$  when  $\theta = 0$  and  $90^\circ$ .
